# Supplementary material for: Identification of Endogenous Controls for Analyzing Serum Exosomal miRNA in Patients with Hepatitis B or Hepatocellular Carcinoma
Source: Hindawi journal article supplement (doi:10.1155/2015/893594), 2015-01-01
Supplement: f1 [file 893594.f1.pdf]

**TABLE S1: Descriptions of gene-specific RT-qPCR assays.**

| Gene name                         | Accession number  | Primer Sequences                                             | E(%) | R <sup>2</sup> |
|-----------------------------------|-------------------|--------------------------------------------------------------|------|----------------|
| <b>Candidate reference miRNAs</b> |                   |                                                              |      |                |
| miR-16                            | MIMAT0000069      | RT 5'GTCGTATCCAGTGCAGGGTCCGAGGTATTTCGCACTGGATACGACCGCAA 3'   | 98.2 | 0.998          |
|                                   |                   | F 5' GCCCGTAGCAGCAGTAAATATT 3'                               |      |                |
| miR-103                           | MIMAT0000101      | RT 5'GTCGTATCCAGTGCAGGGTCCGAGGTATTTCGCACTGGATACGACTCATAG 3'  | 96.3 | 0.999          |
|                                   |                   | F 5' GGTATAGCAGCATTGTACAGGGC 3'                              |      |                |
| miR-191                           | MIMAT0000440      | RT 5'GTCGTATCCAGTGCAGGGTCCGAGGTATTTCGCACTGGATACGACCAGCTG 3'  | 96.8 | 0.999          |
|                                   |                   | F 5' GGTAACAACGGAATCCAAAAGC 3'                               |      |                |
| let-7a                            | MIMAT0000062      | RT 5'GTCGTATCCAGTGCAGGGTCCGAGGTATTTCGCACTGGATACGACAACATAT 3' | 94.4 | 0.997          |
|                                   |                   | F 5' GCCGCTGAGGTAGTAGGTGTAT 3'                               |      |                |
| miR-26a                           | MIMAT0000082      | RT 5'GTCGTATCCAGTGCAGGGTCCGAGGTATTTCGCACTGGATACGACAGCCTA 3'  | 91.9 | 0.993          |
|                                   |                   | F 5' GCCGCTTCAAGTAATCCAGGATA 3'                              |      |                |
| miR-221                           | MIMAT0000278      | RT 5'GTCGTATCCAGTGCAGGGTCCGAGGTATTTCGCACTGGATACGACGAAACC 3'  | 97.2 | 0.996          |
|                                   |                   | F 5' GCCTAAGCTACATTGTCTGCTGG 3'                              |      |                |
| miR-22*                           | MIMAT0004495      | RT 5'GTCGTATCCAGTGCAGGGTCCGAGGTATTTCGCACTGGATACGACTAAAGC 3'  | 93   | 0.997          |
|                                   |                   | F 5' GCATCAGTTCTTCAGTGGCAAGC 3'                              |      |                |
| miR-181a                          | MIMAT0000256      | RT 5'GTCGTATCCAGTGCAGGGTCCGAGGTATTTCGCACTGGATACGACTCAC 3'    | 95.8 | 0.998          |
|                                   |                   | F 5' CGTGCTAACATTCAACGCTGTC 3'                               |      |                |
| miR-181c                          | MIMAT0000258      | RT 5'GTCGTATCCAGTGCAGGGTCCGAGGTATTTCGCACTGGATACGACTCAC 3'    | 93.8 | 0.997          |
|                                   |                   | F 5' GCATAACATTCAACCTGTCGGT 3'                               |      |                |
| <b>Interest miRNA</b>             |                   |                                                              |      |                |
| miR-21                            | MIMAT0000076      | RT 5'GTCGTATCCAGTGCAGGGTCCGAGGTATTTCGCACTGGATACGACTCAACA 3'  | 98   | 0.996          |
|                                   |                   | F 5' GCCGTTAGCTTATCAGACTGATG 3'                              |      |                |
|                                   | miRNA universal R | 5' GTGCAGGGTCCGAGGT 3'                                       |      |                |

**TABLE S2: Amplicon parameters derived from the RT-qPCR data analysis.**

| Gene     | Y-Intercept | Slope  | PCR efficiency (%) | SE <sup>#</sup> (Efficiency) | R <sup>2</sup> | Linear dynamic range <sup>§</sup> | Ct variation at the lowest limit(SD) <sup>&amp;</sup> | Ct of NTC <sup>*</sup> |
|----------|-------------|--------|--------------------|------------------------------|----------------|-----------------------------------|-------------------------------------------------------|------------------------|
| miR-16   | 12.29       | -3.366 | 98.2               | 0.012                        | 0.998          | 12.04-28.97                       | 0.18                                                  | UD                     |
| miR-22*  | 16.4        | -3.501 | 93                 | 0.018                        | 0.997          | 16.40-38.43                       | 0.78                                                  | UD                     |
| U6       | 15.71       | -3.534 | 91.9               | 0.037                        | 0.988          | 15.97-38.00                       | 0.09                                                  | UD                     |
| 5S       | 12.32       | -3.475 | 94                 | 0.035                        | 0.99           | 11.51-33.27                       | 0.58                                                  | 38.4476                |
| miR-181c | 16.22       | -3.48  | 93.8               | 0.02                         | 0.997          | 16.12-37.99                       | 0.9                                                   | 38.7177                |
| miR-181a | 16.05       | -3.426 | 95.8               | 0.016                        | 0.998          | 16.16-37.31                       | 0.6                                                   | UD                     |
| miR-221  | 15.76       | -3.39  | 97.2               | 0.024                        | 0.996          | 15.75-32.38                       | 0.1                                                   | UD                     |
| miR-26a  | 16.52       | -3.532 | 91.9               | 0.03                         | 0.993          | 16.00-34.32                       | 0.59                                                  | UD                     |
| let-7a   | 16.64       | -3.463 | 94.4               | 0.018                        | 0.997          | 16.55-34.21                       | 0.18                                                  | UD                     |
| miR-191  | 15.97       | -3.401 | 96.8               | 0.011                        | 0.999          | 15.94-33.02                       | 0.19                                                  | 39.5648                |
| miR-103  | 12.72       | -3.414 | 96.3               | 0.012                        | 0.999          | 12.82-30.21                       | 0.12                                                  | UD                     |
| miR-21   | 13.45       | -3.48  | 93.8               | 0.01                         | 0.996          | 13.43-32.02                       | 0.25                                                  | UD                     |

<sup>#</sup> The SE value is the mean squared error of the single data points fit to the regression line and is calculated by the GenEx Standard software.

<sup>§</sup> The linear dynamic range represents the range of the Ct values between the highest and the lowest concentration of the linear interval of the calibration curve.

<sup>&</sup> Ct variations given as the SD at the endpoint of the linear dynamic range that correspond to the lowest concentration in the linear interval of the calibration curve.

<sup>\*</sup> UD represents undetermined data.
